# Supplementary material for: Embedding of Mg-doped V2O5nanoparticles in a carbon matrix to improve their electrochemical properties for high-energy rechargeable lithium batteries
Source: Royal Society of Chemistry journal article supplement (doi:10.1039/c7ta02761c), 2017-01-01
Supplement: c7ta02761c1.pdf [file c7ta02761c1.pdf]

## Electronic Supplementary Information

### Embedding of Mg-doped V<sub>2</sub>O<sub>5</sub> nanoparticles in carbon matrix to improve their electrochemical properties for high-energy rechargeable lithium batteries

Fang Xiao<sup>a</sup>, Xuexia Song<sup>a</sup>, Zhaohui Li<sup>\*a</sup>, Honglai Zhang<sup>a</sup>, Lingjun Zhang<sup>a</sup>, Gangtie Lei<sup>a</sup>, Qizhen Xiao<sup>a</sup>,  
Zhongliang Hu<sup>\*b</sup> and Yanhuai Ding<sup>c</sup>

<sup>a</sup>Key Laboratory of Environmentally Friendly Chemistry and Applications of Ministry of Education,  
College of Chemistry, Xiangtan University, Hunan 411105, P.R. China

<sup>b</sup>College of Metallurgy and Material Engineering, Hunan University of Technology, Hunan 412007,  
P.R. China

<sup>c</sup>College of Civil Engineering & Mechanics, Institute of Rheology Mechanics, Xiangtan University, Hunan 411105, P.R.  
. China

#### 1. Preparation of the PMAA template

At first, 0.010 g of sodium dodecyl sulfate (SDS), 1.750 g of methacrylic acid (MAA), and 0.093 g of *N,N'*-methylenebisacrylamide (MBA) were added to a three-necked flask that filled with 125 ml de-ionized water, and then mechanically stirred at room temperature for 1h. The flask was equipped with a nitrogen inlet, a mechanical stirrer and a Hirsch funnel, and immersed in a water bath. Subsequently, a solution of 0.140 g ammonium persulfate (APS) in 25 ml de-ionized water was added dropwise under agitation, and was bubbled with N<sub>2</sub> for 0.5h at room temperature. After that, the temperature of water bath was raised to 75°C and maintained for 2h to perform the cross-linked polymerization of MAA monomers. As a result, a creamy-white suspension was formed, and the pH of the suspension was adjusted to 6 by 5 M ammonium hydroxide. The filter residue was washed with 20 ml acetone three times and dried under vacuum at room temperature to get the cross-linked PMAA microspheres finally. It can be seen that the diameter of the microgel spheres ranges from 10 to 20 μm (Fig. S1).

---

\* Corresponding author, Tel.: +86 731 58292206; fax: +86 731 58292251.  
E-mail address: [lzh69@xtu.edu.cn](mailto:lzh69@xtu.edu.cn) (Z.H. Li), [david10103@sina.com](mailto:david10103@sina.com) (Z.L. Hu)

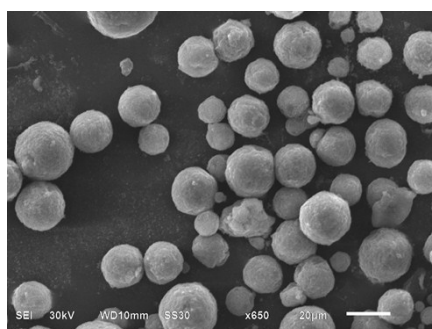

Fig. S1 SEM image of the as-prepared PMAA microgel spheres (scale bar: 20  $\mu\text{m}$ ).

## 2. Thermo-gravimetric analysis of the precursor and $\text{V}_2\text{O}_5@\text{C}$ spheres

Fig. S2a shows the TG/DTG curves of the precursor in nitrogen atmosphere over the temperature range of 50–600  $^{\circ}\text{C}$  at 10  $^{\circ}\text{C min}^{-1}$ . It can be seen that the precursor lost the absorbed water below 200  $^{\circ}\text{C}$ , and the vanadium-based compounds were decomposed to form the  $\text{V}_2\text{O}_5$  at 258  $^{\circ}\text{C}$ . The cross-linked PMAA macromolecules are decomposed at 346  $^{\circ}\text{C}$ . At 375  $^{\circ}\text{C}$ , the formed  $\text{V}_2\text{O}_5$  nanoparticles might be crystallized further. Thermo-gravimetric analysis (TGA) of the obtained  $\text{V}_2\text{O}_5@\text{C}$  composite material was performed in air (Fig. S2b). As is shown that, the weight loss was about 9% when the heating temperature was raised to 500  $^{\circ}\text{C}$ . TG curves for the doped samples are shown in Fig. S2 c, d and e. The carbon content in the composite is 9.5%, 8.8% and 9.7% for the HVC-2, HVC-3 and HVC-4 samples, respectively. Thus, the  $\text{V}_2\text{O}_5$  contents in the HVC-1, HVC-2, HVC-3, and HVC-4 samples are calculated to 91.0%, 90.5%, 91.2%, and 90.7%, respectively.

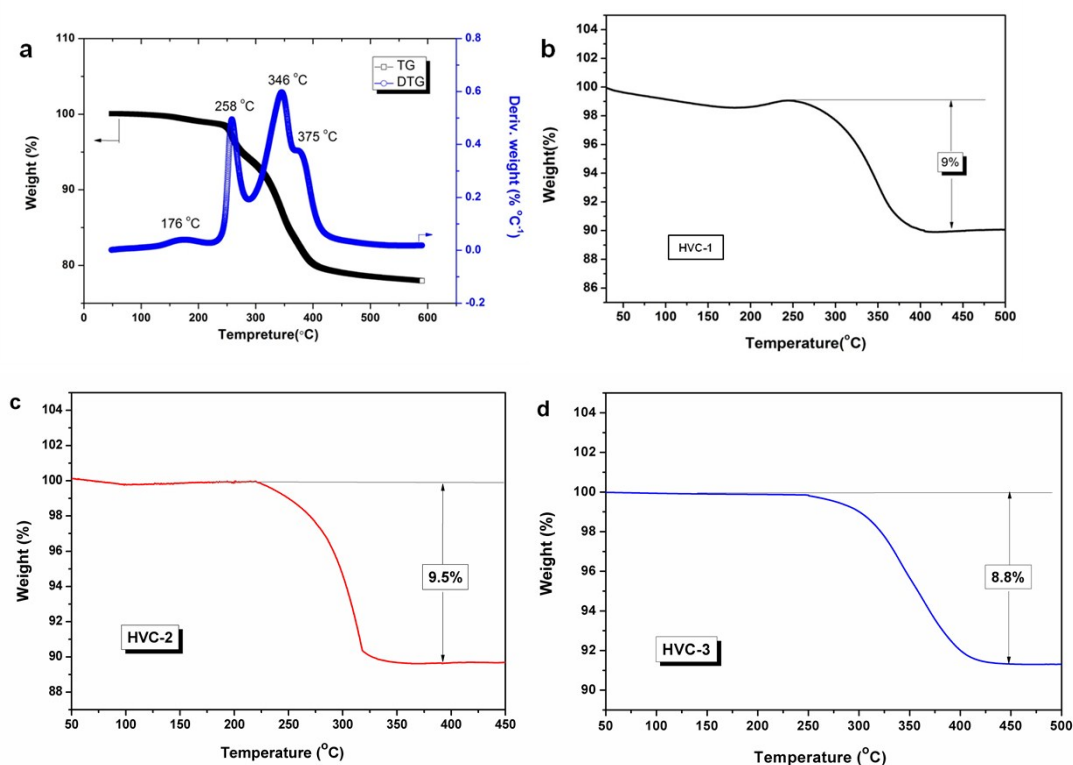

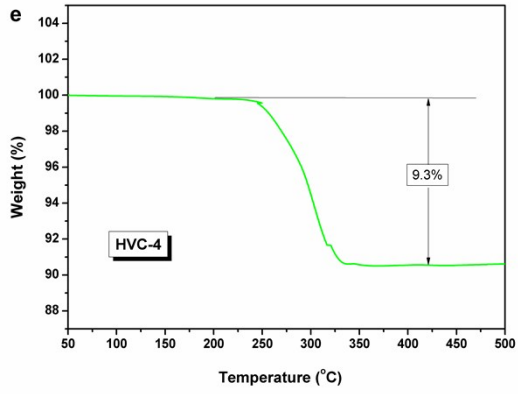

Fig.S2 TG/DTG curves of the precursors of  $V_2O_5@C$  in nitrogen atmosphere (a); TG curves of the as-prepared  $V_2O_5@C$  (b),  $Mg_{0.05}V_2O_5@C$  (c),  $Mg_{0.1}V_2O_5@C$  (d) and  $Mg_{0.15}V_2O_5@C$  (e) in air.

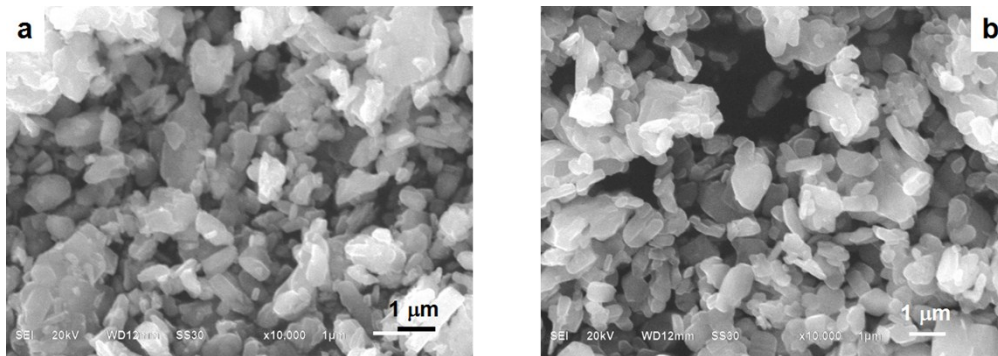

Fig. S3 SEM images of the  $V_2O_5$  (a) and  $Mg_{0.1}V_2O_5$  (b) particles prepared without using the PMAA template.

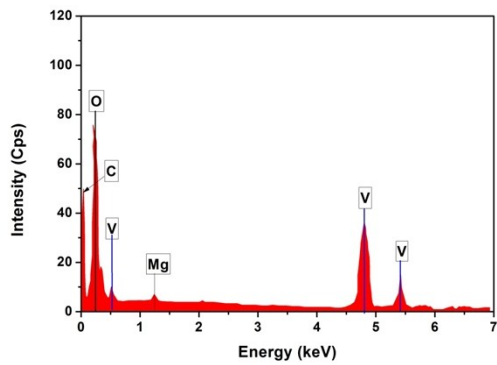

Fig. S4 EDX pattern of the HVC-3 sample.

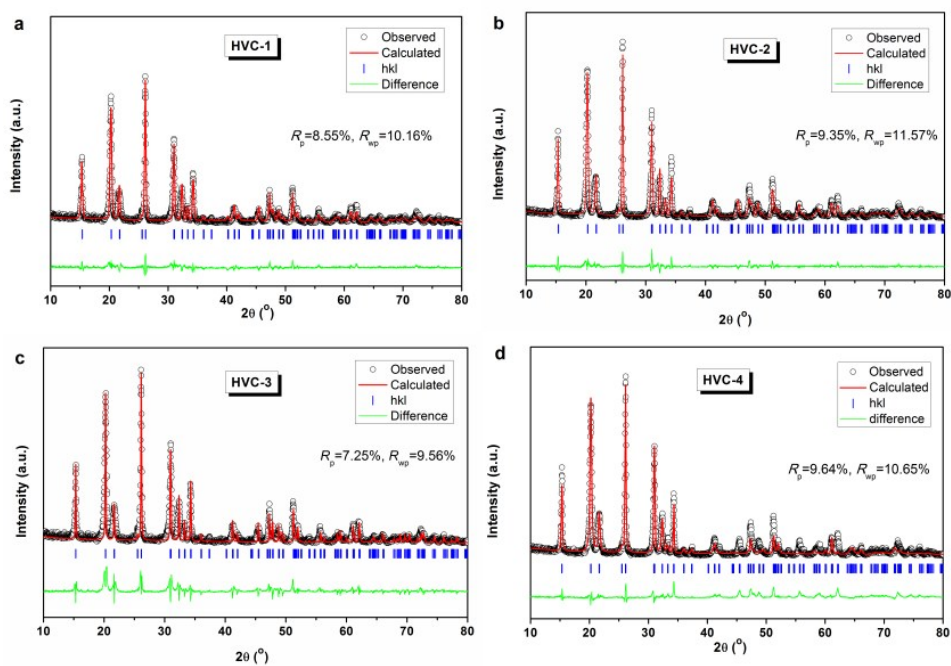

Fig. S5 Rietveld refinement results of the HVC examples using the standard orthorhombic structure.  $R_p$ : profile factor related to the residual error directly calculated by the Model structure of the XRD spectrum with the experimental data.  $R_{wp}$ : weight profile factor that increases the weight of a particular location based on  $R_p$ .<sup>63</sup>

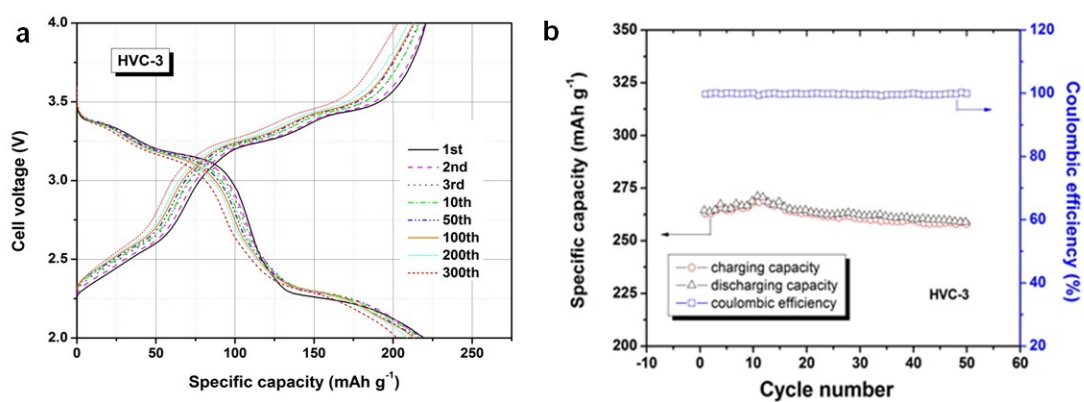

Fig. S6 (a) Galvanostatic charge-discharge curves of the HVC-3 sample at the current density of 1.5 A  $g^{-1}$  during different cycles. (b) Coulombic efficiencies of the HVC-3 sample at the 0.03 A  $g^{-1}$  over the 2.0-4.0 V potential range during the first 50 cycles.

Table S1. Theoretical capacities of the HVC samples over the potential range of 1.5-4.0 V (vs. Li<sup>+</sup>/Li) when the carbon content and pre-inserted Mg<sup>2+</sup> in the composite is taken into account.

| Sample | $P$   | $\alpha$ | $C_t$<br>(mAh g <sup>-1</sup> )* |
|--------|-------|----------|----------------------------------|
| HVC-1  | 0.91  | 0        | 401.3                            |
| HVC-2  | 0.905 | 0.046    | 393.9                            |
| HVC-3  | 0.912 | 0.094    | 390.5                            |
| HVC-4  | 0.907 | 0.144    | 381.6                            |

\* Theoretical capacity ( $C_t$ ) can be calculated based on the following equation:

$$C_t = \frac{26800 \times (n - \alpha)}{M} \times P \quad (\text{mAh g}^{-1}) \quad (4)$$

where  $M$  is molar mass of the V<sub>2</sub>O<sub>5</sub>, 181.9;  $P$ : mass ratio of V<sub>2</sub>O<sub>5</sub> in the HVC sample;  $\alpha$ : pre-inserted Mg<sup>2+</sup> ions per mole of V<sub>2</sub>O<sub>5</sub> formula;  $n$ : electrons are consumed in the electrochemical reaction in theory, which equals to 3 when the V<sub>2</sub>O<sub>5</sub> cathode operated over the potential range of 1.5-4.0 V (vs. Li<sup>+</sup>/Li).

Table S2. Comparison of the electrochemical properties of the V<sub>2</sub>O<sub>5</sub> nanomaterials within the potential range of 4.0-1.5 V (vs. Li<sup>+</sup>/Li).

| Morphology                                                                       | Rate capability<br>Discharge capacity (at $x$<br>mA g <sup>-1</sup> ) (mAh g <sup>-1</sup> )                                    | Cycling performance<br>Capacity retention (at $x$<br>mA g <sup>-1</sup> after $n$ cycles)               | Ref.*     |
|----------------------------------------------------------------------------------|---------------------------------------------------------------------------------------------------------------------------------|---------------------------------------------------------------------------------------------------------|-----------|
| Nanostrip V <sub>2</sub> O <sub>5</sub>                                          | 427 (7.5 mA g <sup>-1</sup> )<br>390 (15 mA g <sup>-1</sup> )<br>340 (22.5 mA g <sup>-1</sup> )<br>300 (30 mA g <sup>-1</sup> ) | 30% (at 7.5 mA g <sup>-1</sup> after 20<br>cycles)<br>25% (at 30 mA g <sup>-1</sup> after 20<br>cycles) | [62]      |
| Dense and spherical<br>nanostructured V <sub>2</sub> O <sub>5</sub><br>particles | 403 (30 mA g <sup>-1</sup> )                                                                                                    |                                                                                                         | [75]      |
| Spherically shaped dense<br>V <sub>2</sub> O <sub>5</sub> cathode                | 432 (30 mA g <sup>-1</sup> )<br>281 (300 mA g <sup>-1</sup> )                                                                   | 61%(at 30 mA g <sup>-1</sup> after 20<br>cycles)                                                        | [76]      |
| Hierarchical V <sub>2</sub> O <sub>5</sub><br>nanobelts                          | 402 (50 mA g <sup>-1</sup> )                                                                                                    | 42%(at 50 mA g <sup>-1</sup> after 50<br>cycles)                                                        | [78]      |
| Plate-like structured V <sub>2</sub> O <sub>5</sub>                              | 470 (17 mA g <sup>-1</sup> )<br>120 (1360 mA g <sup>-1</sup> )                                                                  | 81% (at 170 mA g <sup>-1</sup> after 45<br>cycles)                                                      | [81]      |
| Mulberry-like<br>Mg <sub>0.1</sub> V <sub>2</sub> O <sub>5</sub> spheres         | 410 (30 mA g <sup>-1</sup> )<br>284 (1500 mA g <sup>-1</sup> )                                                                  | 84% (at 30 mA g <sup>-1</sup> after 50<br>cycles)                                                       | This work |

\* The reference numbers are consistent with those listed in the main manuscript.
